# Supplementary material
Source: PubMed Central journal article supplement (PMC7189096)
Supplement: MCB.00535-19-s0005.pdf [file MCB.00535-19-s0005.pdf]

**Supplemental material for**  
**Requirement of the Cep57-Cep63 interaction for proper Cep152 recruitment**  
**and centriole duplication**

Zhuang Wei<sup>1,7</sup>, Tae-Sung Kim<sup>1,7</sup>, Jong Il Ahn<sup>1</sup>, Lingjun Meng<sup>1</sup>, Yaozong Chen<sup>1</sup>, Eun Kyoung Ryu<sup>2</sup>, Bonsu Ku<sup>3</sup>, Ming Zhou<sup>4</sup>, Seung Jun Kim<sup>3</sup>, Jeong Kyu Bang<sup>2</sup>, Jan M. van Deursen<sup>5,6</sup>, Jung-Eun Park<sup>1</sup>, Kyung S. Lee<sup>1</sup> \*

**Supplemental Movies**

**Movie S1** 3D reconstruction of the images shown in Fig. 6A.

**Movie S2** 3D reconstruction of the images shown in Fig. 6E

**Movie S3** 3D reconstruction of another set of images obtained for Fig. 6E

**Movie S4** 3D reconstruction of the images shown in Fig. 6F.
